# Supplementary material for: Targeting DYRK1B suppresses the proliferation and migration of liposarcoma cells
Source: PubMed Central journal article supplement (PMC5862568; doi:10.18632/oncotarget.22743), 2017-11-28
Supplement: oncotarget-09-13154-s001.pdf [file oncotarget-09-13154-s001.pdf]

# Targeting DYRK1B suppresses the proliferation and migration of liposarcoma cells

## SUPPLEMENTARY MATERIALS

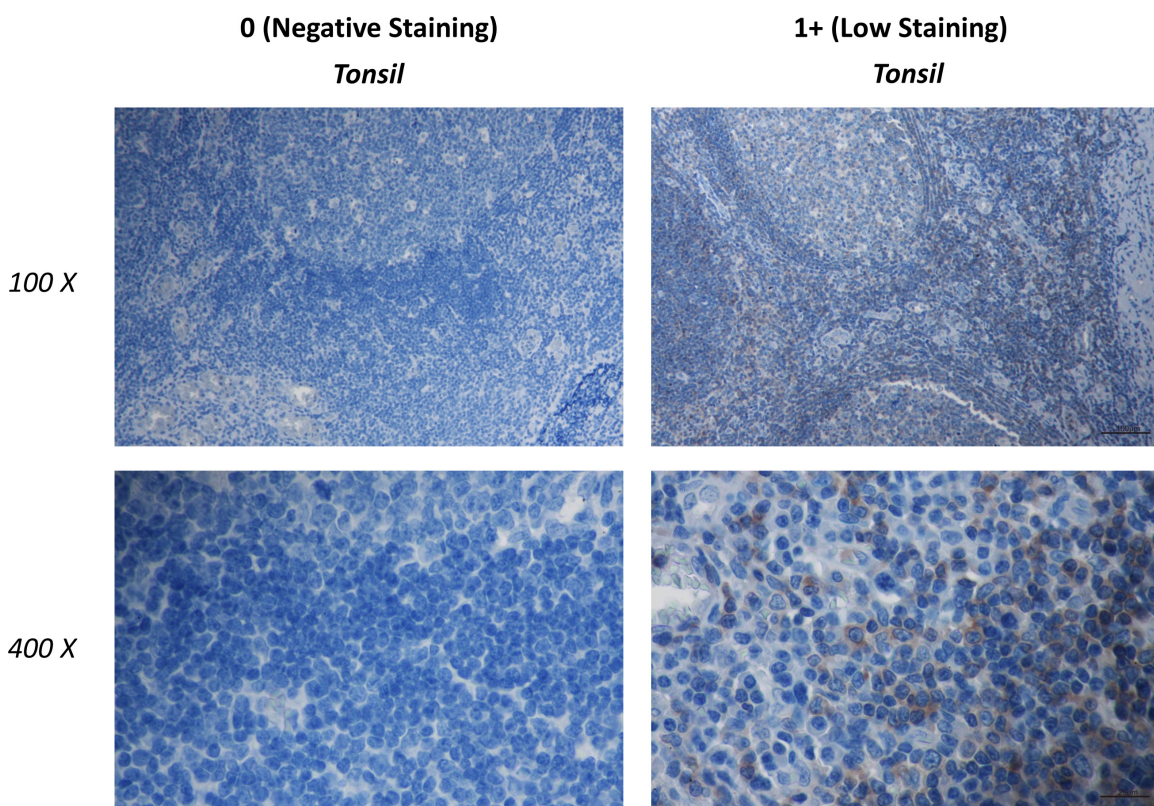

**Supplementary Figure 1: Representative images of DYRK1B staining in human normal tonsil tissues as negative control and positive control for IHC.** Original magnification: 100× and 400×. Scale bar = 100 μm (upper 100× photos) or 25 μm (lower 400× photos).

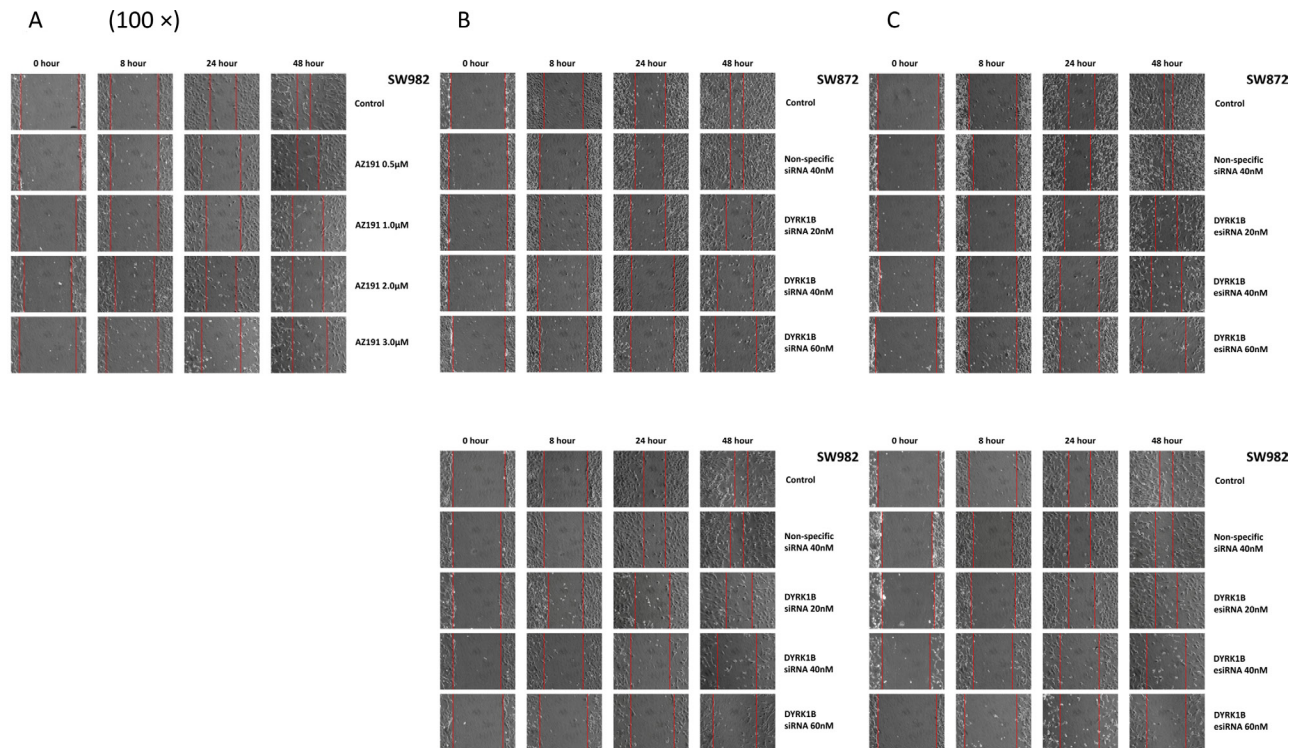

**Supplementary Figure 2: Inhibition of DYRK1B by kinase inhibitor or RNAi impairs migration in liposarcoma cell lines.** (A) Representative migration images SW982 cell lines at different time points (0, 8, 24, and 48 hours) when treated with different concentrations of AZ191. (B) Representative migration images of SW872 and SW982 cell lines at different time points (0, 8, 24, and 48 hours) when treated with different concentrations of DYRK1B siRNA and non-specific siRNA. (C) Representative migration images of SW872 and SW982 cell lines at different time points (0, 8, 24, and 48 hours) when treated with different concentrations of DYRK1B esiRNA and non-specific siRNA. Original magnification: 100 $\times$ . Scale bar = 100  $\mu$ m.
